# Supplementary material for: ppb-Level Selective Hydrogen Gas Detection of Pd-Functionalized In2O3-Loaded ZnO Nanofiber Gas Sensors
Source: MDPI journal article supplement (doi:10.3390/s19194276), 2019-10-02
Supplement: s1 [file s1]

## Supplementary material

### ppb-Level selective hydrogen gas detection of Pd-functionalized In<sub>2</sub>O<sub>3</sub>-loaded ZnO nanofiber gas sensors

Jae-Hyoung Lee<sup>1</sup>, Jae-Hun Kim<sup>1</sup>, Jin-Young Kim<sup>1</sup>, Ali Mirzaei<sup>2,3</sup>, Hyoun Woo Kim<sup>2,4</sup>, Sang Sub Kim<sup>1,\*</sup>

<sup>1</sup> Department of Materials Science and Engineering, Inha University, Incheon 22212, Republic of Korea; 22171057@inha.edu (J.-H.L.); kjhbb5331@hanyang.ac.kr (J.-H.K.); 22171286@inha.edu (J.-Y.K.)

<sup>2</sup> The Research Institute of Industrial Science, Hanyang University, Seoul 04763, Republic of Korea; alisonmirzaee@yahoo.com (A. M.)

<sup>3</sup> Department of Materials Science and Engineering, Shiraz University of Technology, Shiraz, Iran; alisonmirzaee@yahoo.com (A. M.)

<sup>4</sup> Division of Materials Science and Engineering, Hanyang University, Seoul 04763, Republic of Korea; hyounwoo@hanyang.ac.kr (H.W.K.)

\* Correspondence: sangsub@inha.ac.kr; Tel.: +82-32-860-7546 (S.S.K.)

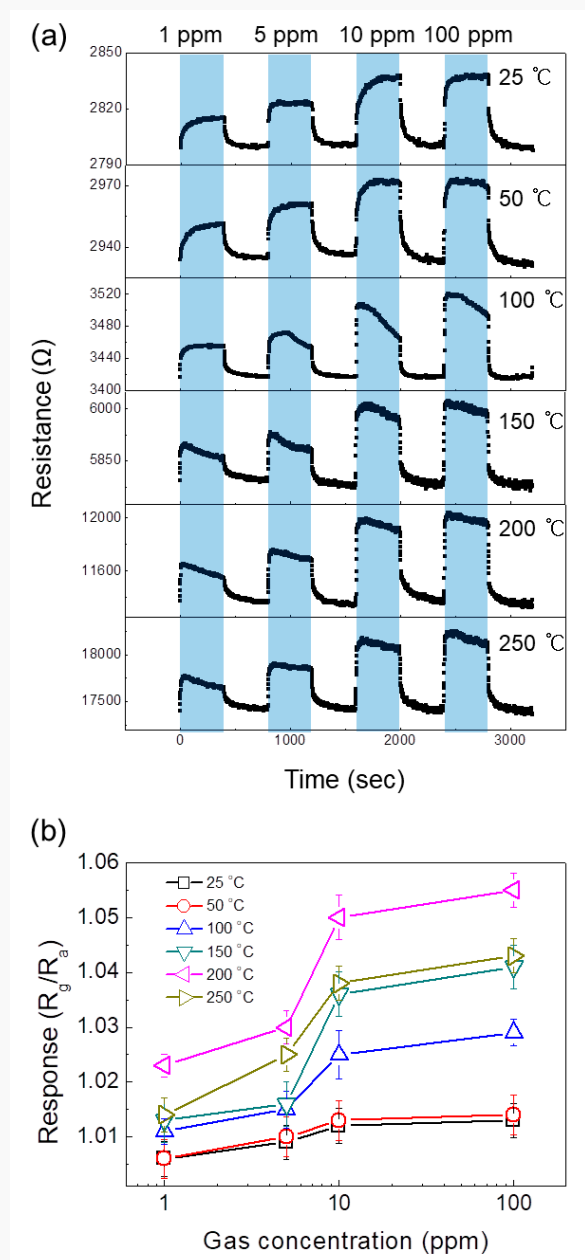

**Figure S1.** (a) Dynamic resistance curves of the pure Pd gas sensor to various concentrations of  $H_2$  gases at different temperatures. (b) Corresponding calibration curves.

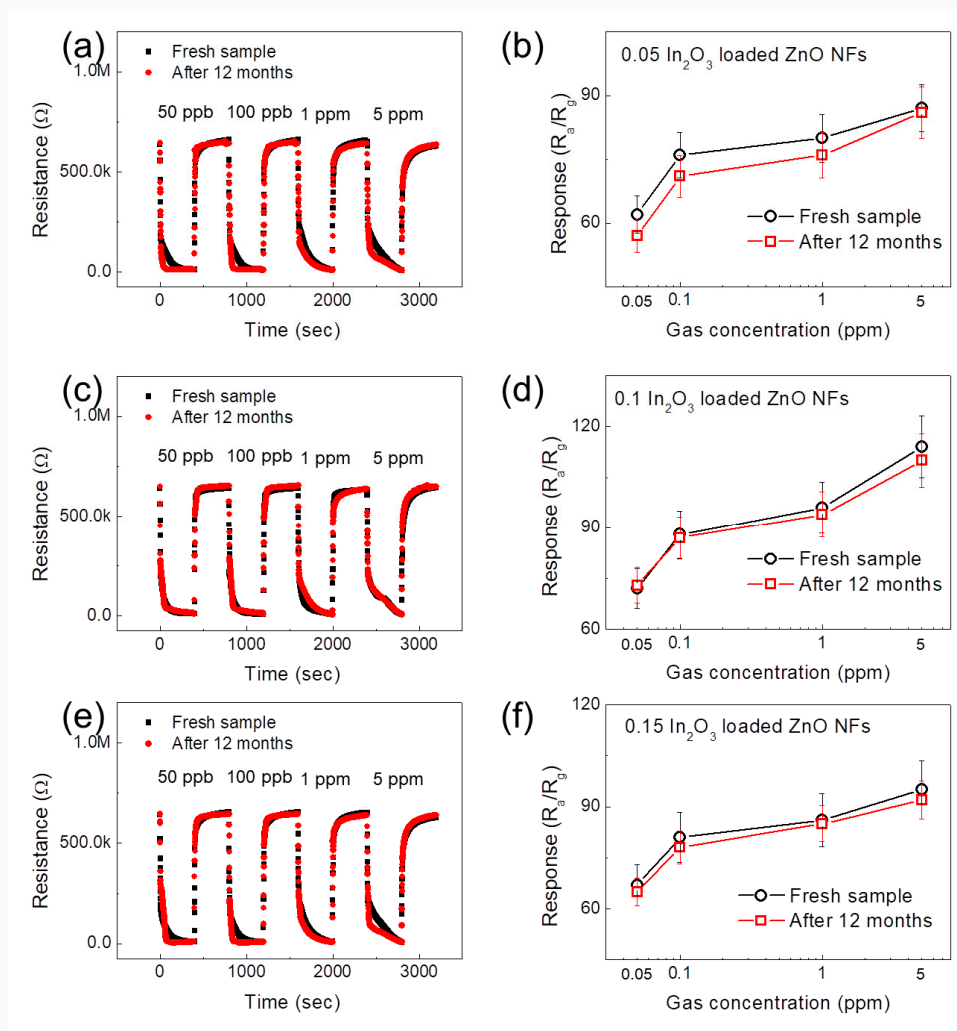

**Figure S2.** Dynamic resistance curves and corresponding response versus  $\text{H}_2$  gas concentration of the fresh and 12 months aged (a) and (b) 0.05, (c) and (d) 0.1 and (e) and (f) 0.15  $\text{In}_2\text{O}_3$ -loaded ZnO NFs gas sensors, respectively.
